# Supplementary figures and images for: Microporous organic crystals: an unusual case for l-leucyl–l-serine
Source: Royal Society of Chemistry journal article supplement (doi:10.1039/b504976h), 2005-01-01

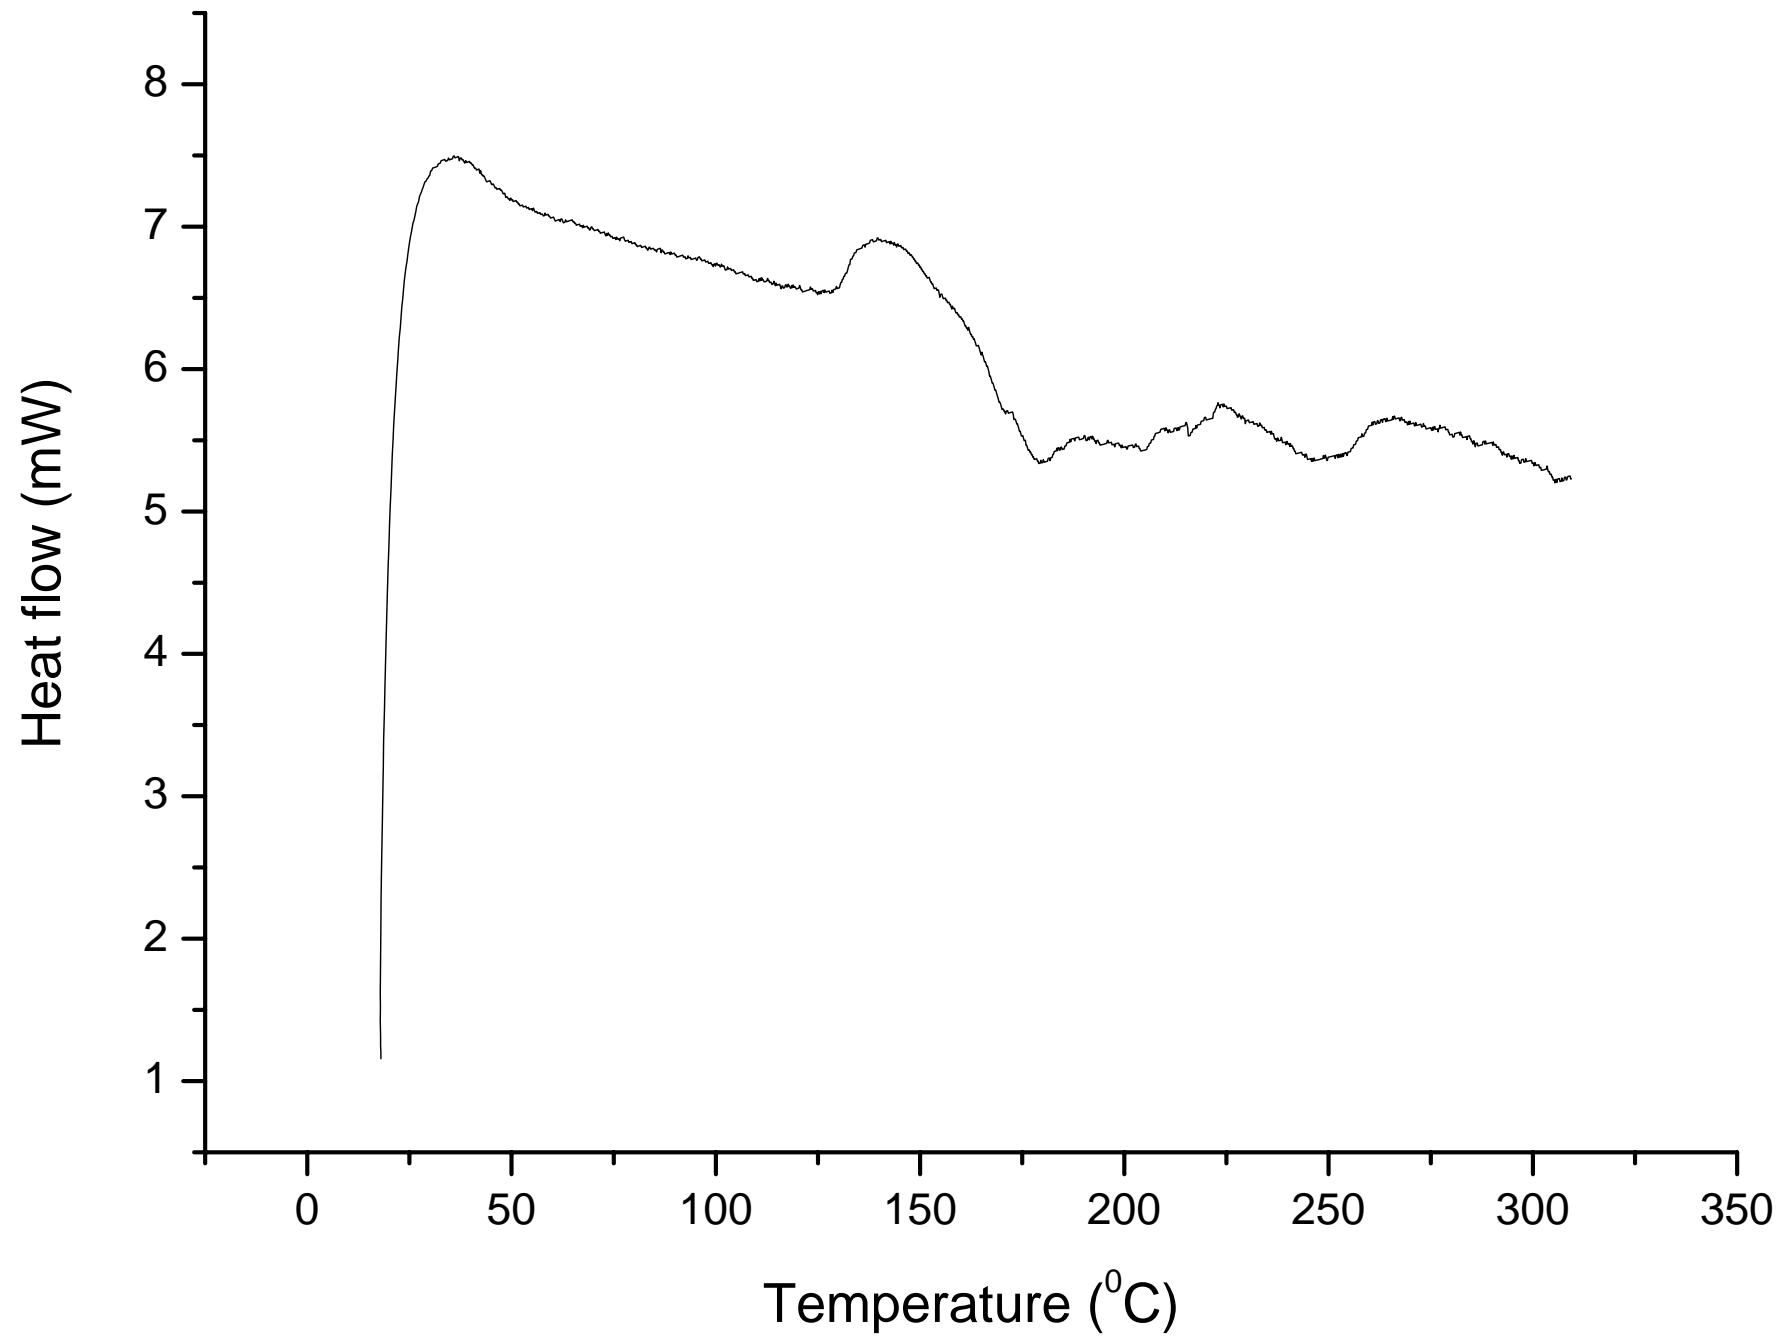

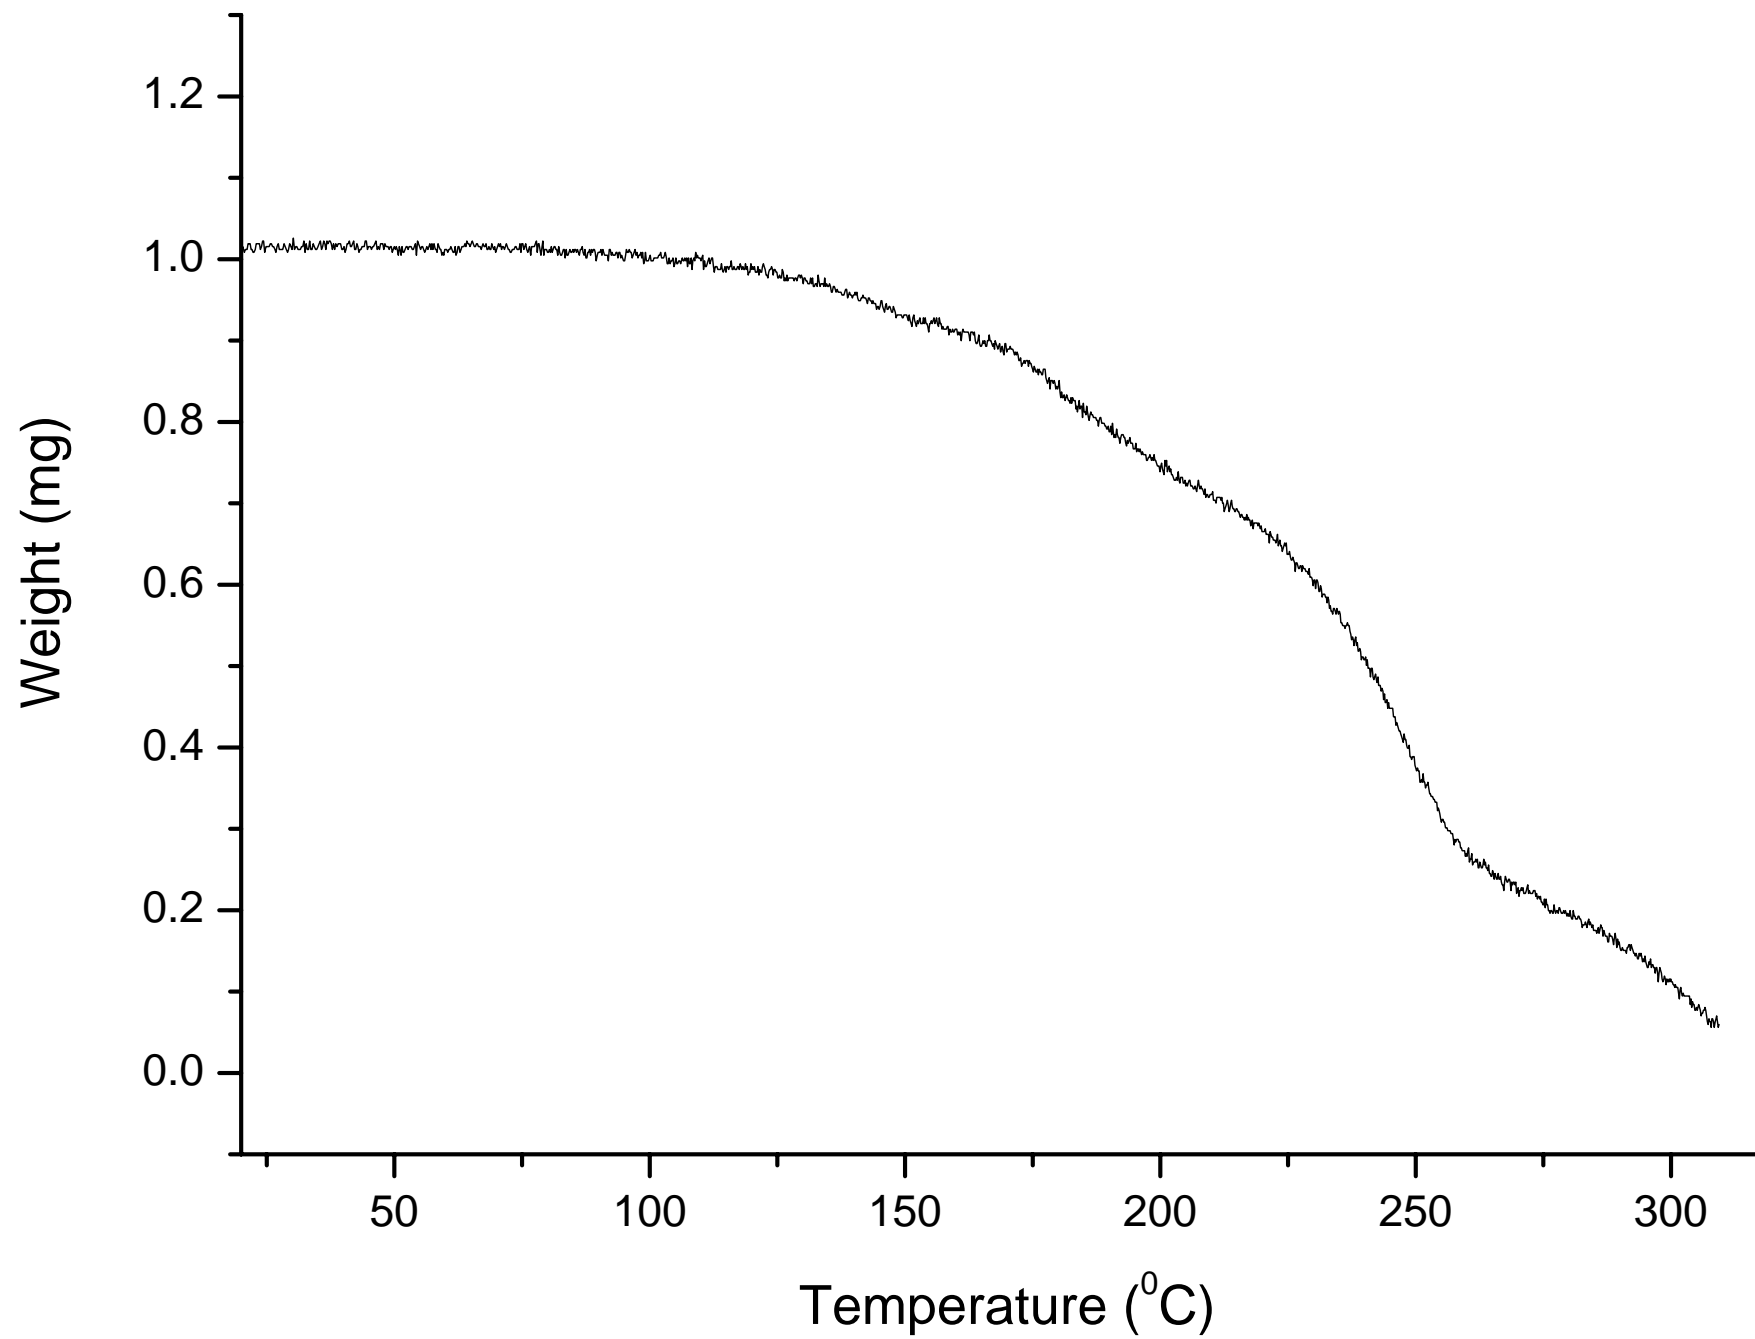

Supplement: b504976h.pdf [file b504976h.pdf]
